# Supplementary material for: Effect of doping indium into a Bi2Te3 matrix on the microstructure and thermoelectric transport properties
Source: Royal Society of Chemistry journal article supplement (doi:10.1039/c6ra09767g), 2016-01-01
Supplement: c6ra09767g1.pdf [file c6ra09767g1.pdf]

## Supplementary Information

### Effect of doped indium into $\text{Bi}_2\text{Te}_3$ matrix on the microstructure and thermoelectric transport properties

Xin Guo,<sup>\*a</sup> Jieming Qin,<sup>a</sup> Xiaoling Lv,<sup>a</sup> Le Deng,<sup>a</sup> Xiaopeng Jia,<sup>b</sup> Hongan Ma<sup>b</sup> and Hongsheng Jia<sup>c</sup>

<sup>a</sup> Institute of Materials Science and Engineering, Changchun University of Science and Technology, Changchun 130022, China. E-mail: guoyml@126.com (Xin Guo)

<sup>b</sup> State Key Laboratory of Superhard Materials, Jilin University, Changchun 130012, China

<sup>c</sup> Key Laboratory of Functional Materials Physics and Chemistry of the Ministry of Education, Jilin Normal University, Siping 136000, China.

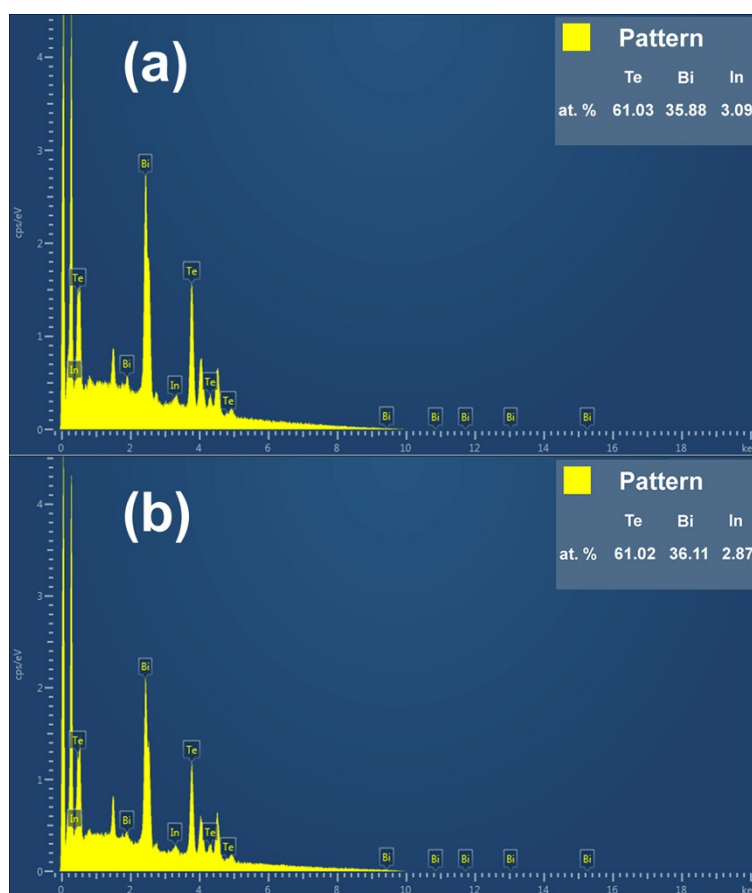

**Fig. S1.** EDS patterns and atomic ratios of A (a) and B (b) regions in Fig.2(c) of the article.

**Table S1.** The atomic ratios analysis of as-prepared samples via EDS measurement.

| Nominal composition                           | Elemental composition |            |            |
|-----------------------------------------------|-----------------------|------------|------------|
|                                               | In (at. %)            | Bi (at. %) | Te (at. %) |
| $\text{Bi}_{1.95}\text{In}_{0.05}\text{Te}_3$ | 1.02                  | 40.21      | 58.77      |
| $\text{Bi}_{1.93}\text{In}_{0.07}\text{Te}_3$ | 1.45                  | 39.48      | 59.07      |
| $\text{Bi}_{1.9}\text{In}_{0.1}\text{Te}_3$   | 2.15                  | 36.51      | 61.34      |
| $\text{Bi}_{1.8}\text{In}_{0.2}\text{Te}_3$   | 3.98                  | 36.92      | 59.10      |
